# Supplementary material for: Biodiversity of Environmental Leptospira: Improving Identification and Revisiting the Diagnosis
Source: PubMed Central journal article supplement (PMC5938396; doi:10.3389/fmicb.2018.00816), 2018-05-01

Supplementary Figure 2: 16S rRNA phylogeny of the *Leptosira* genus with novel species in color

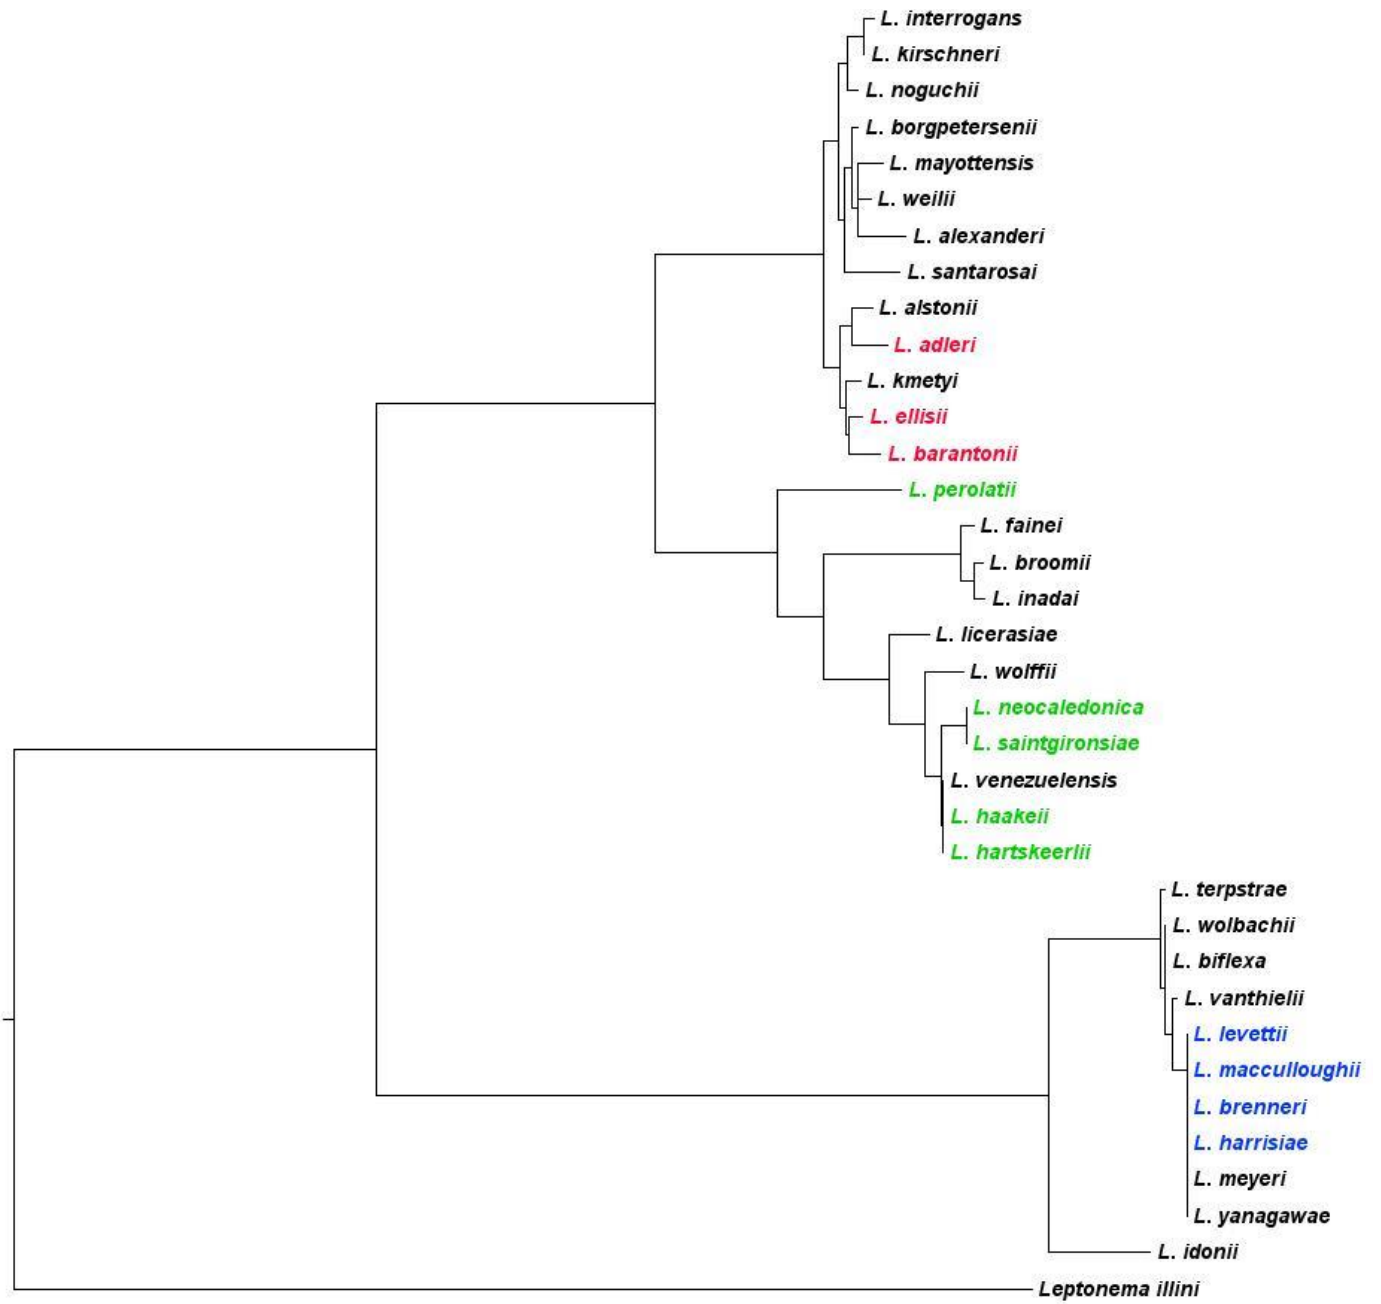

Supplement: Image_2.pdf [file Image_2.pdf]
